# Supplementary material for: Muscle-derived Dpp regulates feeding initiation via endocrine modulation of brain dopamine biosynthesis
Source: PubMed Central journal article supplement — Genes Dev. 2020 Jan 1;34(1-2):37–52. doi: 10.1101/gad.329110.119 (PMC6938663; doi:10.1101/gad.329110.119), 2020-01-01
Supplement: supp_gad.329110.119_SupplementalMaterial.pdf [file supp_gad.329110.119_SupplementalMaterial.pdf]

## SUPPLEMENTAL MATERIAL

**Muscle-derived Dpp regulates feeding initiation via endocrine modulation of brain dopamine biosynthesis**

Maricela Robles-Murguia, Deepti Rao, David Finkelstein, Beisi Xu, Yiping Fan, Fabio Demontis

Supplemental Figures S1–S9

Supplemental Table S1

Supplemental References

## SUPPLEMENTAL FIGURES AND FIGURE LEGENDS

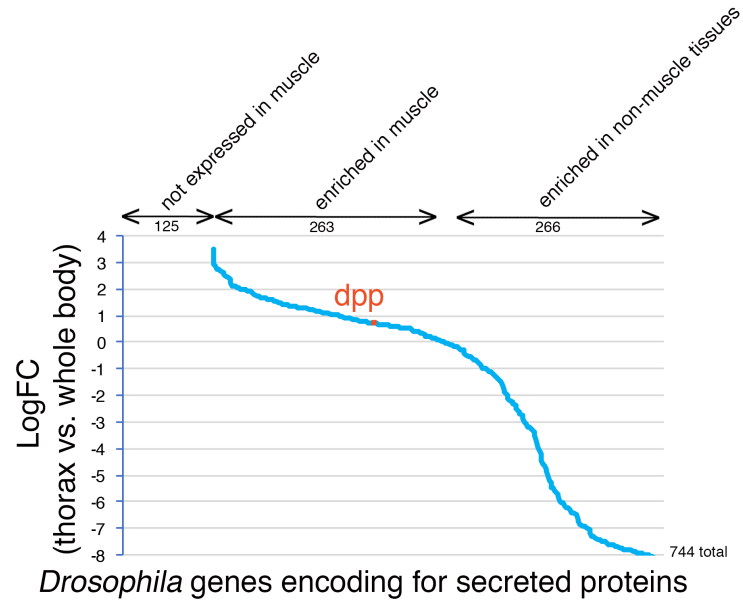

|     | logFC      | PValue      |
|-----|------------|-------------|
| dpp | 0.67311221 | 8.40778E-07 |

### Supplemental Figure S1. *dpp* is expressed in skeletal muscle of adult *Drosophila*.

RNA-seq analyses of transcriptomes from *Drosophila* thoraces, which consist primarily of skeletal muscle, and the whole body. The  $y$  axis reports the logFC of gene expression changes in thoraces versus the whole body whereas the  $x$  axis corresponds to the 744 genes that are predicted to encode for secreted proteins in *Drosophila*. Of these, 125 are not expressed in muscle, 263 have enriched expression in muscle compared to the whole body (LogFC > 0.5,  $p < 0.05$ ), and 266 are enriched in non-muscle tissues (LogFC < -0.5,  $p < 0.05$ ). *dpp* has enriched expression in skeletal muscle versus the whole body.

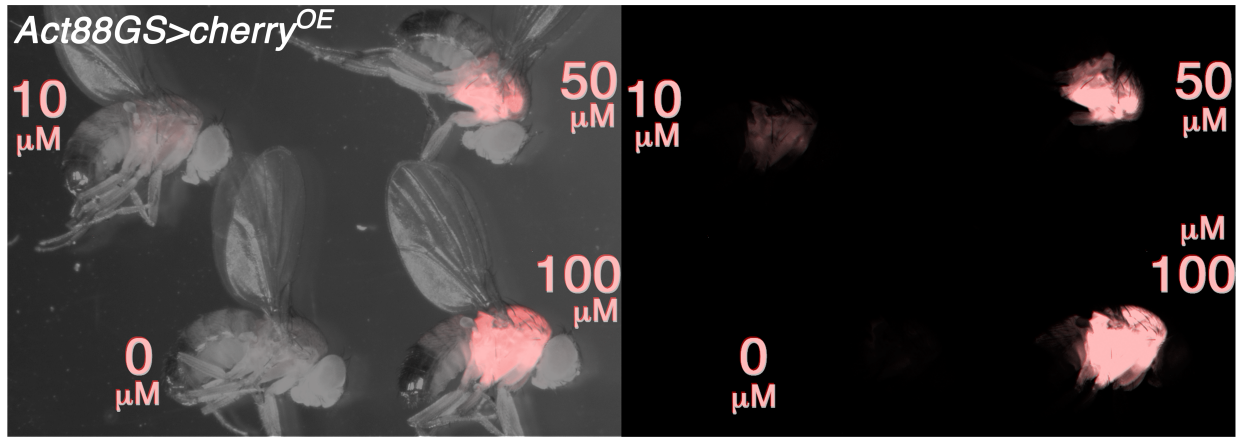

**Supplemental Figure S2. Characterization of the drug-inducible, skeletal muscle-specific *Act88-GeneSwitch-Gal4* driver.**

*Act88-GS-Gal4* (Robles-Murguía et al. 2019) drives transgenic expression in the presence of RU486 in the food, as shown by fluorescence in *Act88GS>cherry<sup>OE</sup>* flies fed food having a final concentration of 10, 50, or 100  $\mu\text{M}$  RU486, compared with control flies (ethanol control; 0  $\mu\text{M}$  RU486). In these flies, a 2-kb *Act88F* promoter region drives *GS-Gal4* expression. As expected, according to the exclusive expression of *Act88F* in skeletal muscle (primarily indirect flight muscles, (Nongthomba et al. 2001)), no apparent *cherry* transgene expression is detected outside of the fly thorax, where indirect flight muscles are located, indicating that *Act88-GS-Gal4* is specific to skeletal muscle.

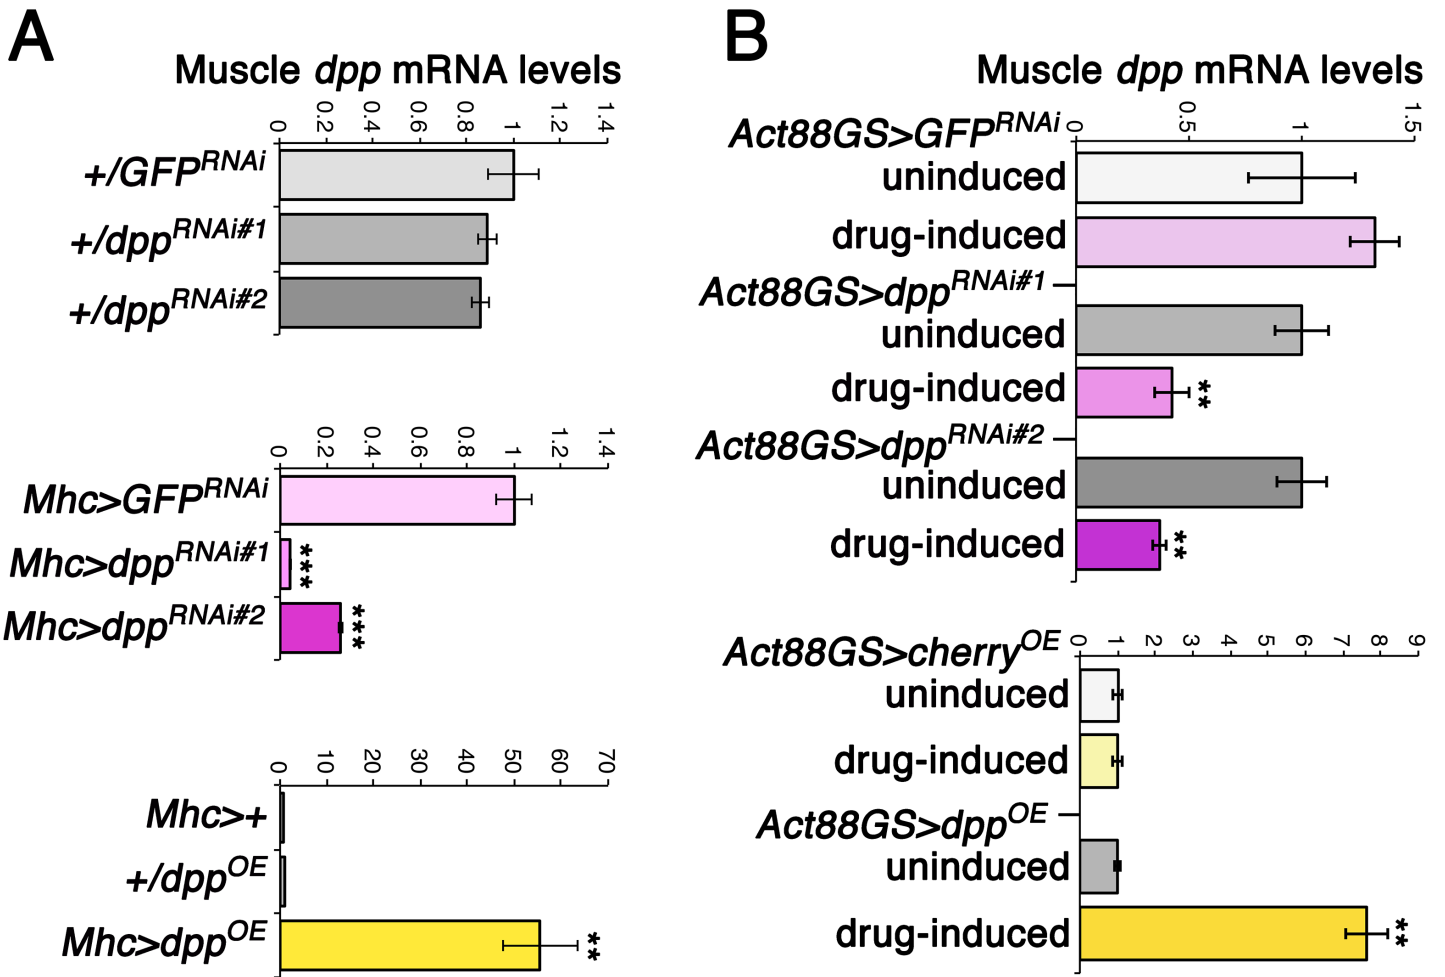

Supplemental Figure S3. Modulation of *dpp* mRNA levels in response to *dpp* RNAi and overexpression in skeletal muscle. (A–B) qRT-PCR analyses of skeletal muscle in which *dpp* mRNA levels are modulated via the Gal4/UAS system (Brand and Perrimon 1993) and the skeletal muscle-specific drivers *Mhc-Gal4* and *Act88-GS-Gal4*. (A) As expected, *dpp* RNAi driven by *Mhc-Gal4* reduces *dpp* mRNA levels whereas *dpp* overexpression increases them, compared with controls. (B) Similar results are obtained with the drug-inducible *Act88-GS-Gal4* driver, compared with uninduced controls. In (A–B), SEM is shown with  $n=4$ , \*\* $p<0.01$ , \*\*\* $p<0.001$ .

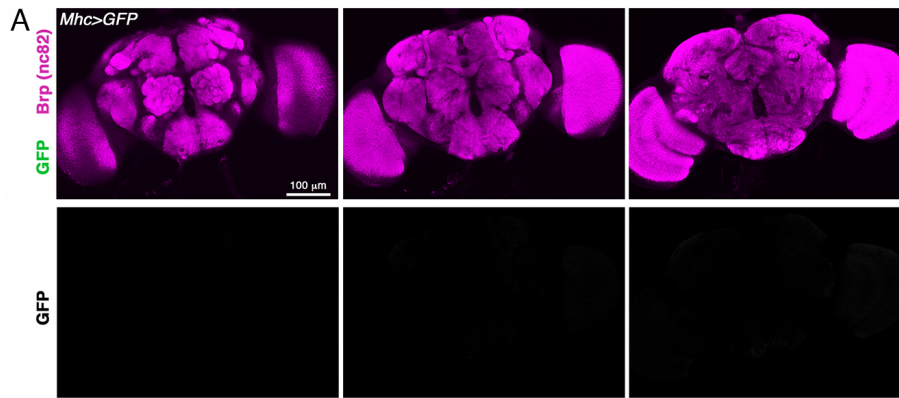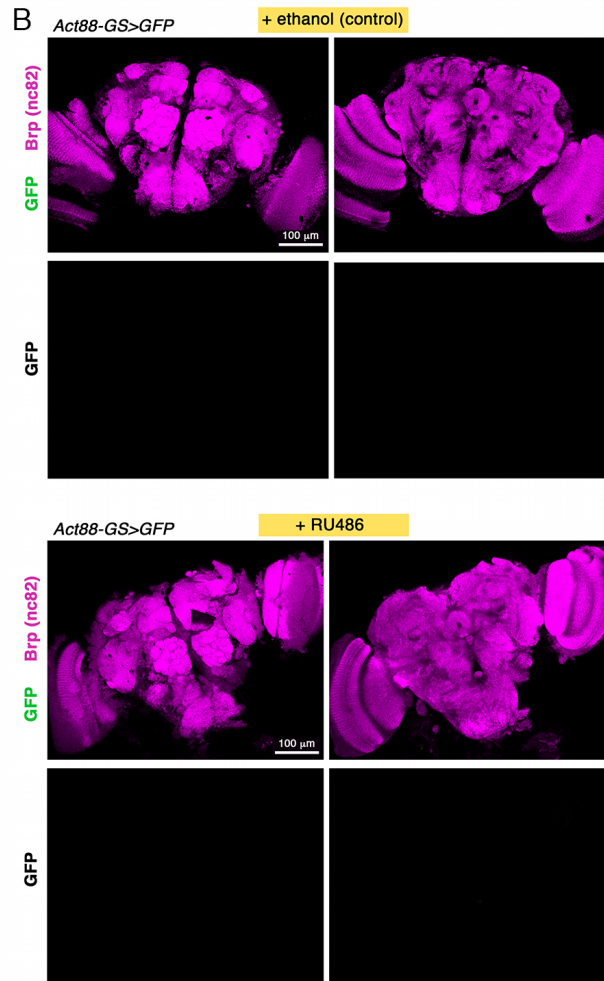

**Supplemental Figure S4. The skeletal muscle-specific *Mhc-Gal4* and *Act88-GeneSwitch-Gal4* drivers do not drive transgene expression in the brain.**

(A–B) Brains from flies with cytosolic GFP transgenic expression driven by (A) *Mhc-Gal4* and (B) *Act88-GeneSwitch-Gal4*. No GFP fluorescence is detected in the brains of *Mhc>GFP* and (B) *Act88-GS>GFP* flies, as expected based on the characterization of these drivers as skeletal muscle-specific (Schuster et al. 1996; Demontis and Perrimon 2010; Robles-Murguía et al. 2019). The overall brain architecture is shown with immunostaining with anti-Brp antibodies (pink). The scale bar is 100  $\mu$ m.

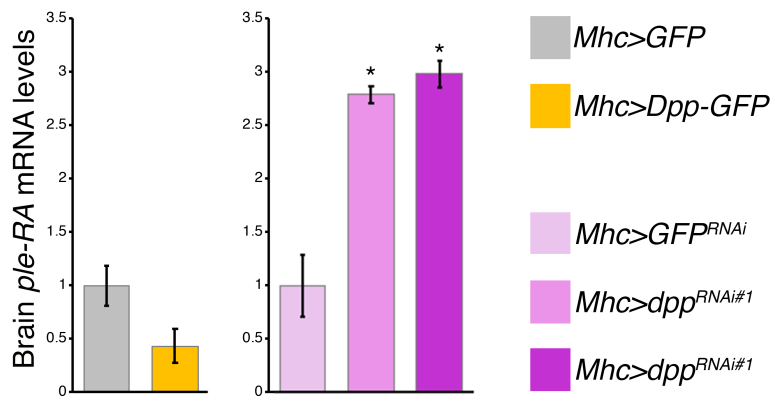

**Supplemental Figure S5. Modulation of *dpp* in skeletal muscle regulates brain expression of *ple-RA*, a brain-specific isoform of *pale*.** qRT-PCR analyses of brains from flies in which *dpp* mRNA levels are modulated via the Gal4/UAS system and the skeletal muscle-specific driver *Mhc-Gal4*. As expected based on Fig. 2C-D, muscle-specific *dpp* RNAi increases brain *ple-RA* expression whereas muscle-specific *dpp* overexpression reduces it, compared with controls. SEM is shown with n=4, \* $p < 0.05$ .

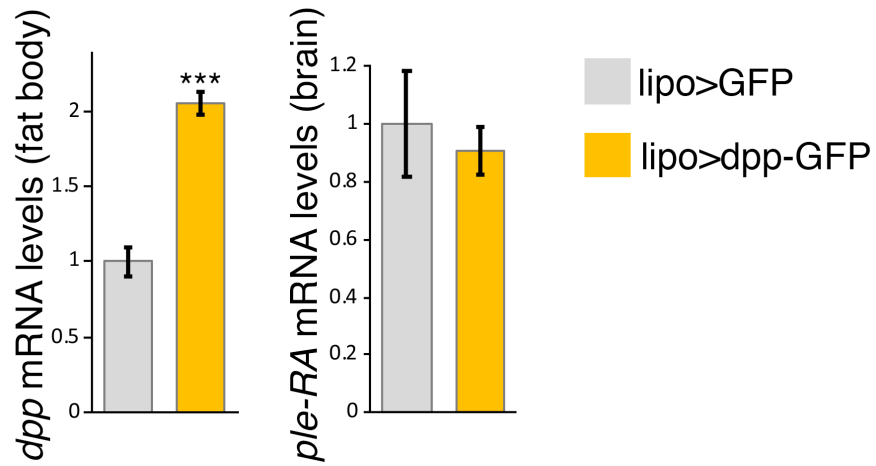

**Supplemental Figure S6. Fat body-specific overexpression of *dpp* with *lipophorin-Gal4*.**

Similar to muscle-derived Dpp, Dpp released by non-muscle tissues may also contribute to regulate brain *TH/ple*. However, only a minimal decrease in *TH/ple* expression is seen in response to *dpp* overexpression in the fat body in presence of *tubulin-Gal80<sup>ts</sup>* at 29°C. Specifically, a 2-fold increase in abdominal *dpp* levels leads to a ~10% decrease in the expression of *ple-RA*, a brain-specific isoform of *pale*. SEM is shown with n=4, \*\*\**p*<0.001.

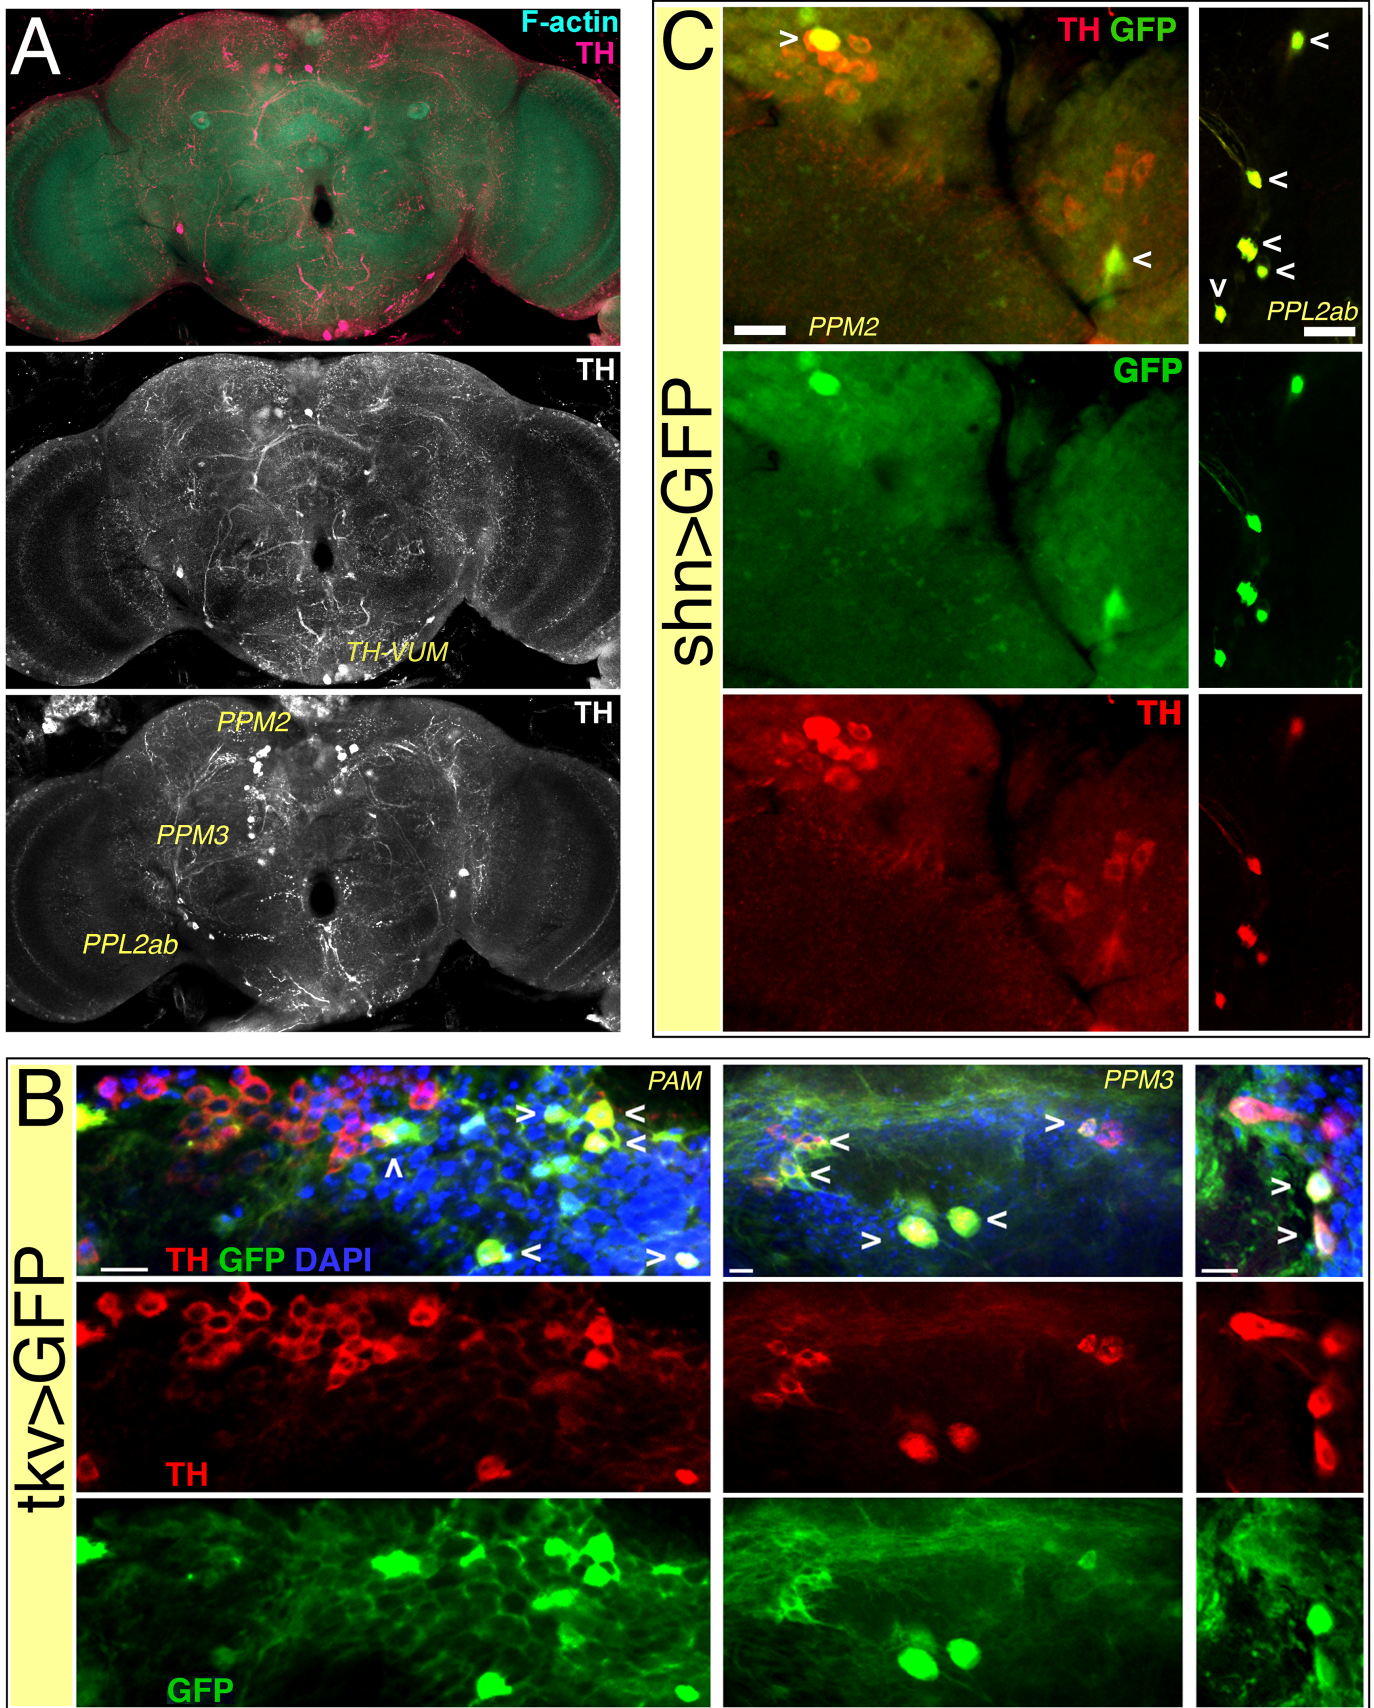

Supplementary Figure S7



**Supplemental Figure S7. Dopaminergic neurons express Dpp receptor signal transduction components.** (A) Immunostaining of brains with anti-TH antibodies identifies previously described clusters of dopaminergic neurons (Mao and Davis 2009), including the TH-VUM previously implicated in the PER (Marella et al. 2012). Alexa635-phalloidin staining is used to detect F-actin and highlight overall brain architecture. Names of some dopaminergic neuronal clusters, based on (Mao and Davis 2009), are indicated in yellow in (A-C). (B) Immunostaining of brains from *tkv>GFP* flies with anti-TH antibodies indicates that some TH-positive dopaminergic neurons display high *GFP* expression and therefore potentially have high expression of the Dpp receptor *tkv*. (C) Similarly, brains from *shn>GFP* flies have TH-positive dopaminergic neurons that display high *GFP* expression, which may indicate a high expression of the transcriptional repressor *shn*.

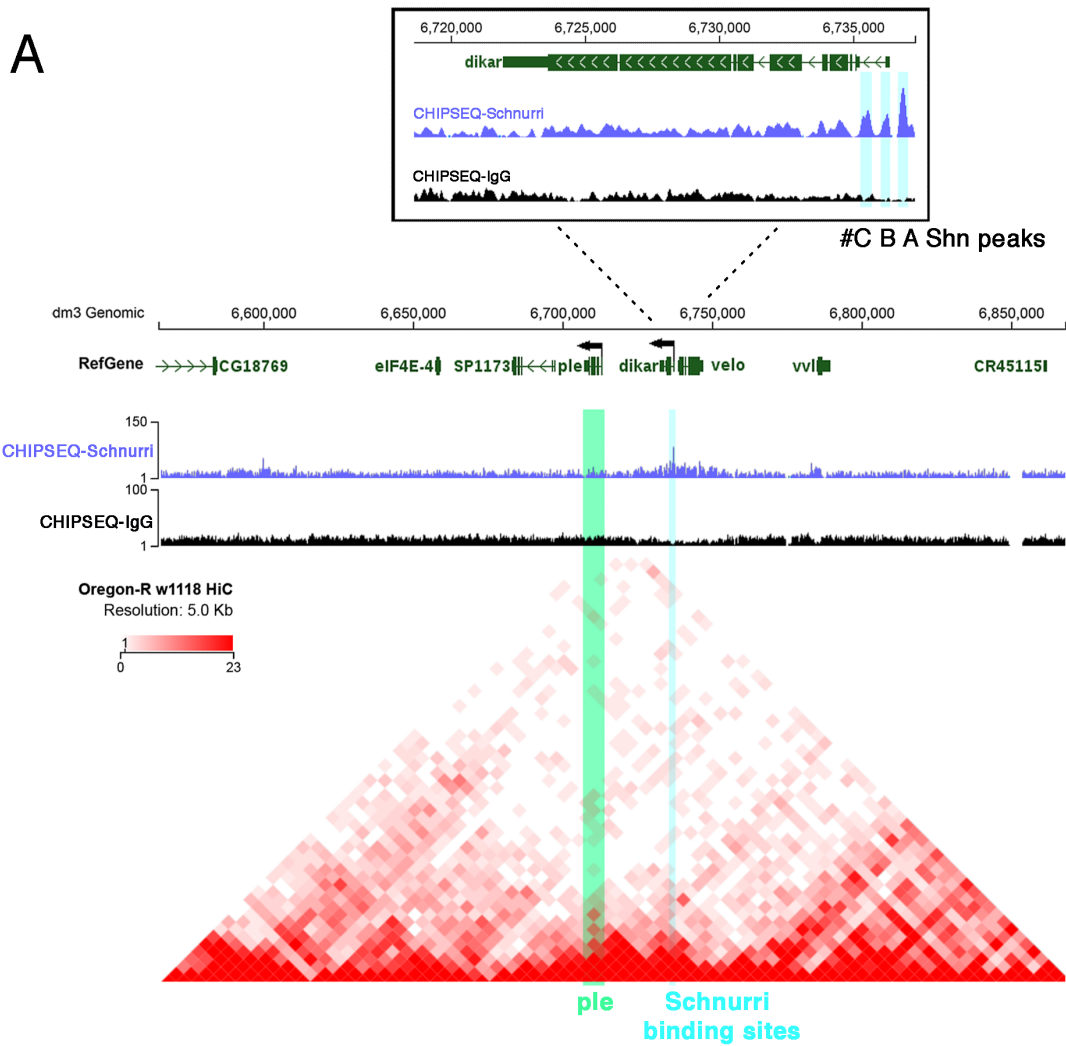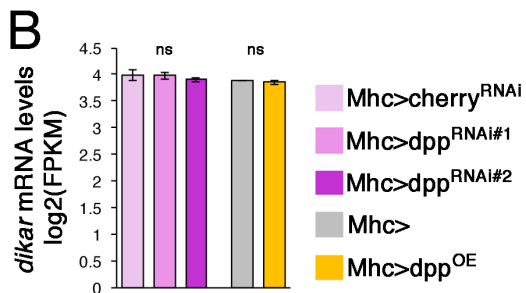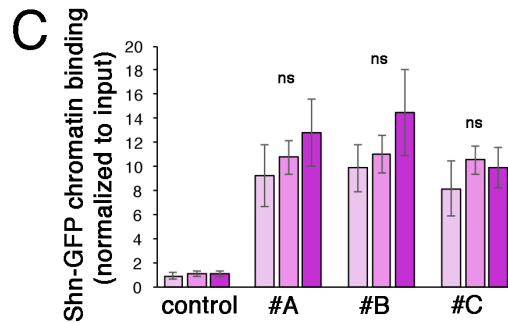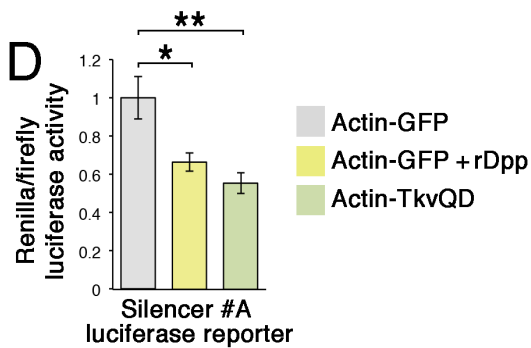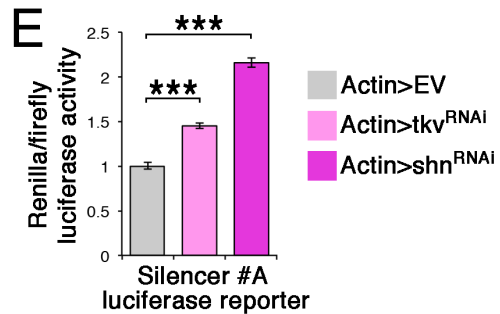

Supplementary Figure S8

**Supplemental Figure S8. A region located near *dikar* is bound by Shn and modulates *ple/TH* expression in response to Dpp.** (A) ChIP-seq data analysis indicates that Shn binds to a region proximal to *dikar*, a gene located near *ple*. Analysis of Hi-C data indicates that this region with Shn binding is located in the same topologically associated domain (TAD) as the *ple* promoter. (B) Gene expression profiling indicates that Dpp does not modulate *dikar* expression, suggesting that the *dikar* promoter region characterized by ChIP-seq Shn peaks may work as a silencer for *ple* expression; log(2)FPKM values are shown, with n=3 and SEM (ns= not significant). (C) Consistent with a previous study reporting that Mad, Medea, and Schnurri are bound to DNA also in the absence of Dpp signaling (Van Bortle et al. 2015), ChIP-qPCR experiments indicate that Shn-GFP binding to the *dikar* promoter does not change in response to muscle-restricted *dpp* RNAi, suggesting that Dpp signaling modulates Shn activity in its DNA-bound state; n=3, SD. Genotype information for (B-C) is provided in (B). (D-E) Luciferase assays in *Drosophila* S2R+ cells with a *Renilla* luciferase reporter based on the *dikar* region bound by Shn (ChIP-seq peak #A). (D) Promotion of Dpp signaling after administration of recombinant Dpp (rDpp; n=14) or expression of a constitutively active version of the Dpp receptor Tkv (Tk<sup>v</sup><sup>QD</sup>; n=7) reduces luciferase activity, compared with control *GFP* expression (n=14). These findings suggest that Dpp signaling decreases *ple/TH* expression via a silencer region in the proximity of *dikar* which is bound by Shn and is in the same TAD of the *ple/TH* promoter. (E) Consistently, RNAi for the Dpp receptor Tkv and for the transcriptional repressor Shn leads to higher luciferase activity (n=15). In (D-E), SEM is indicated with \* $p < 0.05$ , \*\* $p < 0.01$ , \*\*\* $p < 0.001$ ; ns, not significant.

## A Muscle qPCR

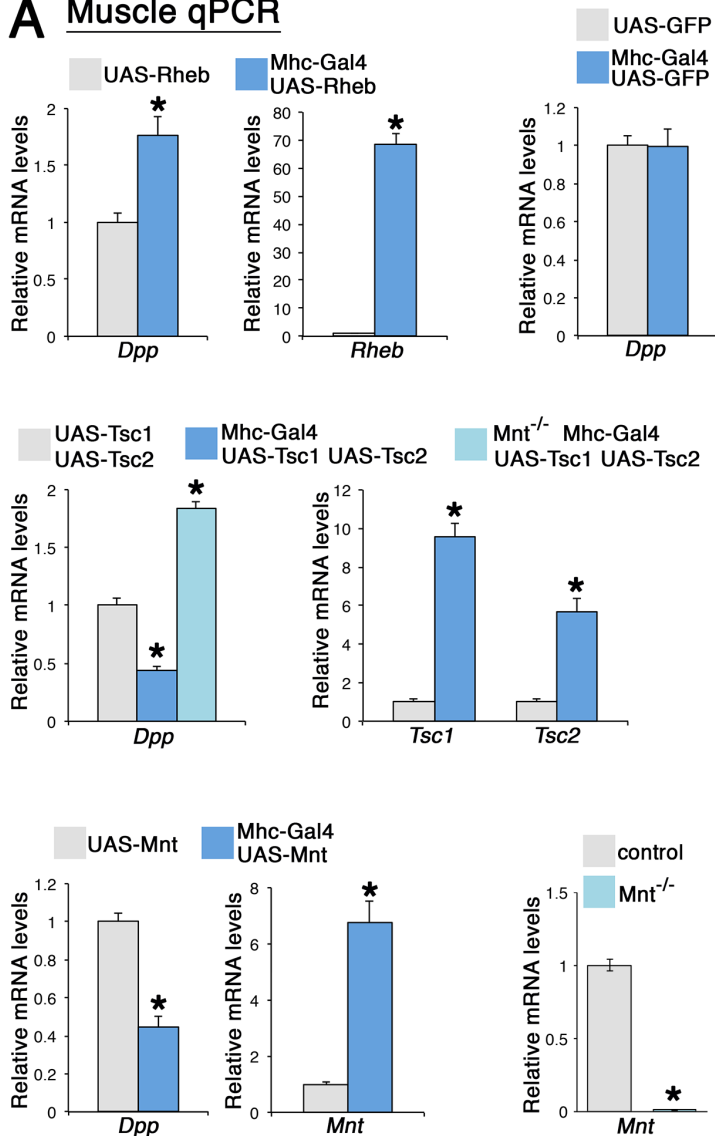

## B Brain qPCR

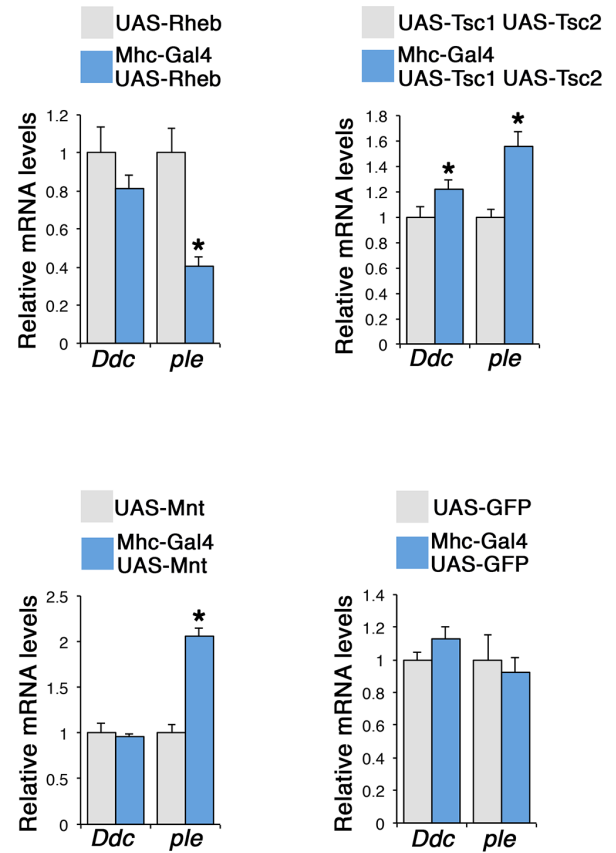

**Supplemental Figure S9. The target of rapamycin (mTOR) nutrient-sensing pathway regulates *dpp* gene expression in skeletal muscle via the transcription factor Mnt.** (A) qRT-PCR from skeletal muscle with activation of mTOR signaling (obtained via *Rheb* overexpression) and inhibition (obtained via overexpression of the tuberous sclerosis complex, formed by *Tsc1* and *Tsc2*). *Rheb* overexpression increases *dpp* mRNA levels, compared to *GFP* and transgene alone controls. Conversely, overexpression of the tuberous sclerosis complex *Tsc1+Tsc2* (an inhibitor of mTOR) reduces *dpp* gene expression via the transcription factor Mnt. Specifically, *Mnt* overexpression similarly inhibits *dpp* gene expression whereas *Tsc1+Tsc2* overexpression reduces *dpp* mRNA levels in wild-type but not in *Mnt* null muscle. (B) qRT-PCR from brains indicates that *TH/ple* expression is modulated in a manner consistent with the modulation of muscle *dpp* levels, whereas *Ddc* expression is typically not regulated. In (A–B), SEM is indicated with n=3 and \**p*<0.05.

**Supplemental Table S1.** RNA–sequencing data from heads of flies with skeletal muscle–specific *dpp* overexpression and *dpp* RNAi. The fold changes (logFC) versus the control samples are indicated, as well as the significance score, which corresponds to  $-\log_{10}(p\text{-value})$ . Two different *dpp* RNAi (#1 and #2) were used.

## SUPPLEMENTAL REFERENCES

- Brand AH, Perrimon N. 1993. Targeted gene expression as a means of altering cell fates and generating dominant phenotypes. *Development* **118**: 401–415.
- Demontis F, Perrimon N. 2010. FOXO/4E–BP signaling in *Drosophila* muscles regulates organism–wide proteostasis during aging. *Cell* **143**: 813–825.
- Mao Z, Davis RL. 2009. Eight different types of dopaminergic neurons innervate the *Drosophila* mushroom body neuropil: anatomical and physiological heterogeneity. *Front Neural Circuits* **3**: 5.
- Marella S, Mann K, Scott K. 2012. Dopaminergic modulation of sucrose acceptance behavior in *Drosophila*. *Neuron* **73**: 941–950.
- Nongthomba U, Pasalodos–Sanchez S, Clark S, Clayton JD, Sparrow JC. 2001. Expression and function of the *Drosophila* ACT88F actin isoform is not restricted to the indirect flight muscles. *J Muscle Res Cell Motil* **22**: 111–119.
- Robles–Murguía M, Hunt LC, Finkelstein D, Fan Y, Demontis F. 2019. Tissue–specific alteration of gene expression and function by RU486 and the GeneSwitch system. *npj Aging and Mechanisms of Disease* volume 5.
- Schuster CM, Davis GW, Fetter RD, Goodman CS. 1996. Genetic dissection of structural and functional components of synaptic plasticity. I. Fasciclin II controls synaptic stabilization and growth. *Neuron* **17**: 641–654.
- Van Bortle K, Peterson AJ, Takenaka N, O'Connor MB, Corces VG. 2015. CTCF–dependent co–localization of canonical Smad signaling factors at architectural protein binding sites in *D. melanogaster*. *Cell Cycle* **14**: 2677–2687.
